# Supplementary material for: Snus Use in Adolescents: A Threat to Oral Health
Source: MDPI journal article supplement (doi:10.3390/jcm13144235), 2024-07-19
Supplement: s1 [file s1]

# Supplementary materials

*Supplementary Table S1 - Demographics*

| Characteristic  | N          | Overall               | Usage of snus             |                            |                            | p-value <sub>2</sub> |
|-----------------|------------|-----------------------|---------------------------|----------------------------|----------------------------|----------------------|
|                 |            | <b>N = 248 (100%)</b> | <b>Occasional user</b>    | <b>Regular user</b>        | <b>Never used snus</b>     |                      |
|                 |            |                       | N = 36 (15%) <sup>1</sup> | N = 20 (8.1%) <sup>1</sup> | N = 192 (77%) <sup>1</sup> |                      |
| <b>Sex</b>      | 248 (100%) |                       |                           |                            |                            | 0.088                |
| <b>male</b>     |            | 206 (83%)             | 34 (94%)                  | 18 (90%)                   | 154 (80%)                  |                      |
| <b>female</b>   |            | 42 (17%)              | 2 (5.6%)                  | 2 (10%)                    | 38 (20%)                   |                      |
| <b>Age</b>      | 246 (99%)  |                       |                           |                            |                            |                      |
| <b>12</b>       |            | 2 (0.8%)              | 0 (0%)                    | 0 (0%)                     | 2 (1.1%)                   |                      |
| <b>13</b>       |            | 26 (11%)              | 0 (0%)                    | 0 (0%)                     | 26 (14%)                   |                      |
| <b>14</b>       |            | 33 (13%)              | 1 (2.8%)                  | 0 (0%)                     | 32 (17%)                   |                      |
| <b>15</b>       |            | 52 (21%)              | 2 (5.6%)                  | 2 (10%)                    | 48 (25%)                   |                      |
| <b>16</b>       |            | 53 (22%)              | 11 (31%)                  | 1 (5.0%)                   | 41 (22%)                   |                      |
| <b>17</b>       |            | 43 (17%)              | 16 (44%)                  | 5 (25%)                    | 22 (12%)                   |                      |
| <b>18</b>       |            | 20 (8.1%)             | 2 (5.6%)                  | 5 (25%)                    | 13 (6.8%)                  |                      |
| <b>19</b>       |            | 16 (6.5%)             | 4 (11%)                   | 7 (35%)                    | 5 (2.6%)                   |                      |
| <b>20</b>       |            | 1 (0.4%)              | 0 (0%)                    | 0 (0%)                     | 1 (0.5%)                   |                      |
| <b>NA</b>       |            | 2                     | 0                         | 0                          | 2                          |                      |
| <b>Location</b> | 248 (100%) |                       |                           |                            |                            | 0.009                |
| <b>village</b>  |            | 53 (21%)              | 3 (8.3%)                  | 1 (5.0%)                   | 49 (26%)                   |                      |

|                                                        |               |              |          |             |              |        |
|--------------------------------------------------------|---------------|--------------|----------|-------------|--------------|--------|
| capital city                                           |               | 45<br>(18%)  | 9 (25%)  | 4 (20%)     | 32<br>(17%)  |        |
| capital city<br>agglomeration                          |               | 5 (2.0%)     | 2 (5.6%) | 1 (5.0%)    | 2 (1.0%)     |        |
| abroad                                                 |               | 6 (2.4%)     | 3 (8.3%) | 0 (0%)      | 3 (1.6%)     |        |
| city                                                   |               | 139<br>(56%) | 19 (53%) | 14<br>(70%) | 106<br>(55%) |        |
| What regular sports<br>activities do you<br>engage in? | 248<br>(100%) |              |          |             |              | <0.001 |
| football                                               |               | 141<br>(57%) | 10 (28%) | 5 (25%)     | 126<br>(66%) |        |
| football, individual<br>sport                          |               | 3 (1.2%)     | 0 (0%)   | 0 (0%)      | 3 (1.6%)     |        |
| ice-hockey                                             |               | 103<br>(42%) | 26 (72%) | 15<br>(75%) | 62<br>(32%)  |        |
| other team sport                                       |               | 1 (0.4%)     | 0 (0%)   | 0 (0%)      | 1 (0.5%)     |        |
| Highest level of<br>education of mother                | 247<br>(100%) |              |          |             |              |        |
| 8th elementary<br>school grade                         |               | 4 (1.6%)     | 0 (0%)   | 0 (0%)      | 4 (2.1%)     |        |
| doctoral studies                                       |               | 2 (0.8%)     | 0 (0%)   | 0 (0%)      | 2 (1.0%)     |        |
| university                                             |               | 77<br>(31%)  | 17 (47%) | 5 (25%)     | 55<br>(29%)  |        |
| college                                                |               | 53<br>(21%)  | 5 (14%)  | 3 (15%)     | 45<br>(24%)  |        |
| secondary school                                       |               | 49<br>(20%)  | 9 (25%)  | 8 (40%)     | 32<br>(17%)  |        |
| do not know                                            |               | 31<br>(13%)  | 1 (2.8%) | 3 (15%)     | 27<br>(14%)  |        |
| no educational<br>qualifications                       |               | 1 (0.4%)     | 0 (0%)   | 0 (0%)      | 1 (0.5%)     |        |
| vocational training                                    |               | 30<br>(12%)  | 4 (11%)  | 1 (5.0%)    | 25<br>(13%)  |        |
| NA                                                     |               | 1            | 0        | 0           | 1            |        |
| Highest level of<br>education of father                | 248<br>(100%) |              |          |             |              |        |
| 8th elementary<br>school grade                         |               | 3 (1.2%)     | 0 (0%)   | 0 (0%)      | 3 (1.6%)     |        |

|                                                               |            |            |           |           |           |        |
|---------------------------------------------------------------|------------|------------|-----------|-----------|-----------|--------|
| <b>doctoral studies</b>                                       |            | 2 (0.8%)   | 1 (2.8%)  | 0 (0%)    | 1 (0.5%)  |        |
| <b>university</b>                                             |            | 63 (25%)   | 14 (39%)  | 6 (30%)   | 43 (22%)  |        |
| <b>college</b>                                                |            | 55 (22%)   | 6 (17%)   | 4 (20%)   | 45 (23%)  |        |
| <b>secondary school</b>                                       |            | 40 (16%)   | 7 (19%)   | 6 (30%)   | 27 (14%)  |        |
| <b>do not know</b>                                            |            | 31 (13%)   | 0 (0%)    | 3 (15%)   | 28 (15%)  |        |
| <b>vocational training</b>                                    |            | 54 (22%)   | 8 (22%)   | 1 (5.0%)  | 45 (23%)  |        |
| <b>Do you use any other tobacco products?</b>                 | 248 (100%) |            |           |           |           | 0.538  |
| Yes                                                           |            | 3 (1.2%)   | 1 (2.8%)  | 0 (0%)    | 2 (1.0%)  |        |
| No                                                            |            | 245 (99%)  | 35 (97%)  | 20 (100%) | 190 (99%) |        |
| <b>Do you consume articles containing marijuana/cannabis?</b> | 248 (100%) |            |           |           |           | 0.074  |
| Occasionally                                                  |            | 3 (1.2%)   | 2 (5.6%)  | 0 (0%)    | 1 (0.5%)  |        |
| No                                                            |            | 245 (99%)  | 34 (94%)  | 20 (100%) | 191 (99%) |        |
| <b>Do you consume drugs other than marijuana?</b>             | 248 (100%) |            |           |           |           | >0.999 |
| No                                                            |            | 247 (100%) | 36 (100%) | 20 (100%) | 191 (99%) |        |
| Do not want to answer                                         |            | 1 (0.4%)   | 0 (0%)    | 0 (0%)    | 1 (0.5%)  |        |

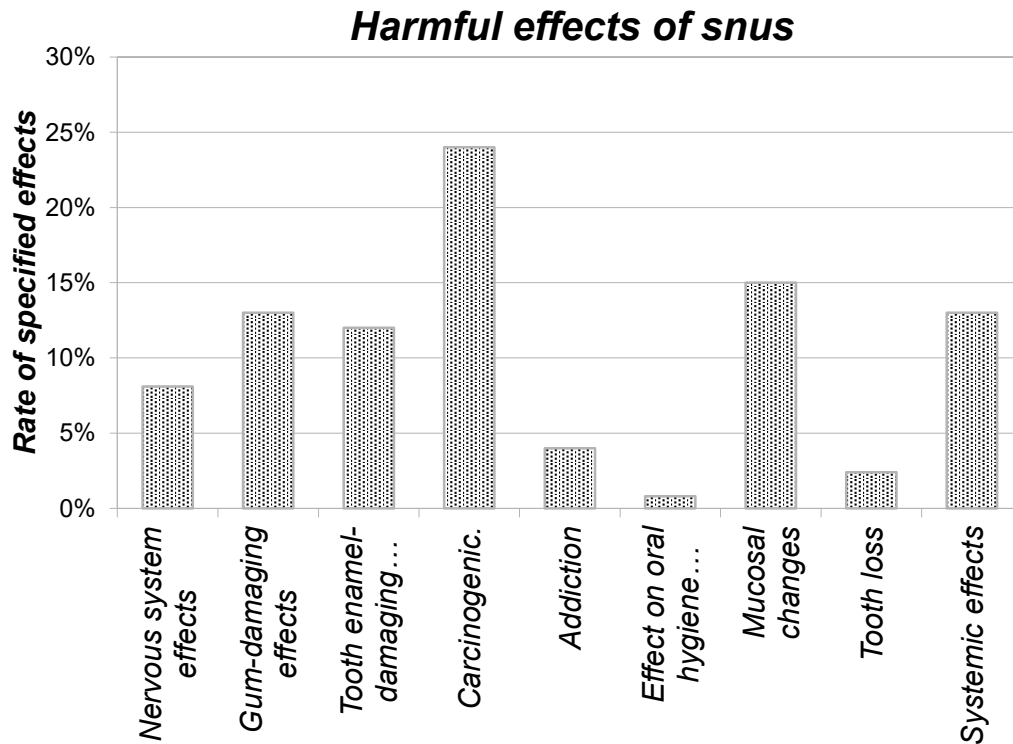

***Supplementary Figure S1 - Specified harmful effects of snus known by the participants***

***Supplementary Table S2 - Harmful effects of snus***

|                                                                                  |            |           |          |          |           |       |
|----------------------------------------------------------------------------------|------------|-----------|----------|----------|-----------|-------|
| Do you know what harmful effects snus has on your body? - nervous system effects | 248 (100%) |           |          |          |           | 0.131 |
| Yes                                                                              |            | 20 (8.1%) | 3 (8.3%) | 4 (20%)  | 13 (6.8%) |       |
| No                                                                               |            | 228 (92%) | 33 (92%) | 16 (80%) | 179 (93%) |       |
| Do you know what harmful effects snus has on your body? - Gum-damaging effects   | 248 (100%) |           |          |          |           | 0.017 |
| Yes                                                                              |            | 32 (13%)  | 10 (28%) | 3 (15%)  | 19 (9.9%) |       |

|                                                                                                       |               |              |              |          |              |        |
|-------------------------------------------------------------------------------------------------------|---------------|--------------|--------------|----------|--------------|--------|
| No                                                                                                    |               | 216<br>(87%) | 26 (72%)     | 17 (85%) | 173<br>(90%) |        |
| <b>Do you know what harmful effects snus has on your body? - Tooth enamel-damaging effects</b>        | 248<br>(100%) |              |              |          |              | 0.639  |
| Yes                                                                                                   |               | 29 (12%)     | 5 (14%)      | 3 (15%)  | 21 (11%)     |        |
| No                                                                                                    |               | 219<br>(88%) | 31 (86%)     | 17 (85%) | 171<br>(89%) |        |
| <b>Do you know what harmful effects snus has on your body? - carcinogenic.</b>                        | 248<br>(100%) |              |              |          |              | <0.001 |
| Yes                                                                                                   |               | 60 (24%)     | 20 (56%)     | 7 (35%)  | 33 (17%)     |        |
| No                                                                                                    |               | 188<br>(76%) | 16 (44%)     | 13 (65%) | 159<br>(83%) |        |
| <b>Do you know what harmful effects snus has on your body? - addiction</b>                            | 248<br>(100%) |              |              |          |              | 0.014  |
| Yes                                                                                                   |               | 10 (4.0%)    | 4 (11%)      | 2 (10%)  | 4 (2.1%)     |        |
| No                                                                                                    |               | 238<br>(96%) | 32 (89%)     | 18 (90%) | 188<br>(98%) |        |
| <b>Do you know what harmful effects snus has on your body? - effect on oral hygiene deterioration</b> | 248<br>(100%) |              |              |          |              | 0.176  |
| Yes                                                                                                   |               | 2 (0.8%)     | 0 (0%)       | 1 (5.0%) | 1 (0.5%)     |        |
| No                                                                                                    |               | 246<br>(99%) | 36<br>(100%) | 19 (95%) | 191<br>(99%) |        |
| <b>Do you know what harmful effects snus has on your body? - mucosal changes</b>                      | 248<br>(100%) |              |              |          |              | 0.813  |

|                                                                                   |            |           |          |           |           |        |
|-----------------------------------------------------------------------------------|------------|-----------|----------|-----------|-----------|--------|
| Yes                                                                               |            | 37 (15%)  | 4 (11%)  | 3 (15%)   | 30 (16%)  |        |
| No                                                                                |            | 211 (85%) | 32 (89%) | 17 (85%)  | 162 (84%) |        |
| <b>Do you know what harmful effects snus has on your body? - tooth loss</b>       | 248 (100%) |           |          |           |           | >0.999 |
| Yes                                                                               |            | 6 (2.4%)  | 1 (2.8%) | 0 (0%)    | 5 (2.6%)  |        |
| No                                                                                |            | 242 (98%) | 35 (97%) | 20 (100%) | 187 (97%) |        |
| <b>Do you know what harmful effects snus has on your body? - systemic effects</b> | 248 (100%) |           |          |           |           | 0.007  |
| Yes                                                                               |            | 31 (13%)  | 2 (5.6%) | 7 (35%)   | 22 (11%)  |        |
| No                                                                                |            | 217 (88%) | 34 (94%) | 13 (65%)  | 170 (89%) |        |
| <b>Do you know what harmful effects snus has on your body? - Do not know</b>      | 247 (100%) |           |          |           |           | 0.011  |
| Yes                                                                               |            | 109 (44%) | 9 (25%)  | 6 (30%)   | 94 (49%)  |        |
| No                                                                                |            | 138 (56%) | 27 (75%) | 14 (70%)  | 97 (51%)  |        |

***Supplementary Table S3 – Snus consumption habits***

|                                     | N        | Overall    | Occasional user | Regular user | p-value <sup>2</sup> |
|-------------------------------------|----------|------------|-----------------|--------------|----------------------|
|                                     |          | 248 (100%) | 36 (15%)        | 20 (8.1%)    |                      |
| <b>When did you first try snus?</b> | 56 (23%) |            |                 |              | 0.263                |
| 12-13                               |          | 2 (3.6%)   | 0 (0%)          | 2 (10%)      |                      |
| 13-14                               |          | 4 (7.1%)   | 3 (8.3%)        | 1 (5.0%)     |                      |
| 14-15                               |          | 18 (32%)   | 11 (31%)        | 7 (35%)      |                      |

|                                                                                  |           |          |          |          |        |
|----------------------------------------------------------------------------------|-----------|----------|----------|----------|--------|
| 15-16                                                                            |           | 18 (32%) | 14 (39%) | 4 (20%)  |        |
| 16 years old or older                                                            |           | 14 (25%) | 8 (22%)  | 6 (30%)  |        |
| NA                                                                               |           | 192      | 0        | 0        |        |
| <b>What type of snus do you use?</b>                                             | 8 (3.2%)  |          |          |          | >0.999 |
| Portion/ pouch/ sachet                                                           |           | 6 (78%)  |          | 6 (78%)  |        |
| Filtered                                                                         |           | 1 (13%)  |          | 1 (13%)  |        |
| Loose                                                                            |           | 1 (13%)  |          | 1 (13%)  |        |
| NA                                                                               |           | 240      | 36       | 12       |        |
| <b>Where do you place it inside your mouth?</b>                                  | 20 (8.1%) |          |          |          | >0.999 |
| Between the upper lip and the gum                                                |           | 19 (95%) |          | 19 (95%) |        |
| Between the upper lip and the gum, between the lower lip and the gum             |           | 1 (5.0%) |          | 1 (5.0%) |        |
| NA                                                                               |           | 228      | 36       | 0        |        |
| <b>On average, how many minutes do you keep a portion of snus in your mouth?</b> | 20 (8.1%) |          |          |          | >0.999 |
| <10 minutes                                                                      |           | 7 (35%)  |          | 7 (35%)  |        |
| 10-30 minutes                                                                    |           | 9 (45%)  |          | 9 (45%)  |        |
| 30-60 minutes                                                                    |           | 2 (10%)  |          | 2 (10%)  |        |
| Variable                                                                         |           | 2 (10%)  |          | 2 (10%)  |        |
| NA                                                                               |           | 228      | 36       | 0        |        |

|                                                                     |              |          |    |          |        |
|---------------------------------------------------------------------|--------------|----------|----|----------|--------|
| <b>Do you usually keep multiple portions in your mouth at once?</b> | 20<br>(8.1%) |          |    |          | >0.999 |
| Yes                                                                 |              | 6 (30%)  |    | 6 (30%)  |        |
| No                                                                  |              | 14 (70%) |    | 14 (70%) |        |
| NA                                                                  |              | 228      | 36 | 0        |        |
| <b>How often do you use snus?</b>                                   | 20<br>(8.1%) |          |    |          | >0.999 |
| Occasionally                                                        |              | 6 (30%)  |    | 6 (30%)  |        |
| A few times a week                                                  |              | 1 (5.0%) |    | 1 (5.0%) |        |
| Daily                                                               |              | 4 (20%)  |    | 4 (20%)  |        |
| Multiple times a day                                                |              | 9 (45%)  |    | 9 (45%)  |        |
| NA                                                                  |              | 228      | 36 | 0        |        |
| <b>How many years have you been using it regularly?</b>             | 17<br>(6.9%) |          |    |          | >0.999 |
| 0                                                                   |              | 1 (5.9%) |    | 1 (5.9%) |        |
| 1                                                                   |              | 7 (41%)  |    | 7 (41%)  |        |
| 2                                                                   |              | 5 (29%)  |    | 5 (29%)  |        |
| 3                                                                   |              | 1 (5.9%) |    | 1 (5.9%) |        |
| 4                                                                   |              | 2 (12%)  |    | 2 (12%)  |        |
| 6                                                                   |              | 1 (5.9%) |    | 1 (5.9%) |        |
| NA                                                                  |              | 231      | 36 | 3        |        |



**Supplementary Table S4 - Oral status, oral hygiene habits**

|                                                             |               |           |          |          |           |        |
|-------------------------------------------------------------|---------------|-----------|----------|----------|-----------|--------|
| <b>Do you experience ulcerative lesions in your mouth?</b>  | 20<br>(8.1%)  |           |          |          |           | >0.999 |
| Yes, but they occur elsewhere                               |               | 1 (5.0%)  | 0 (NA%)  | 1 (5.0%) | 0 (NA%)   |        |
| Yes, where the snus comes into contact                      |               | 5 (25%)   | 0 (NA%)  | 5 (25%)  | 0 (NA%)   |        |
| No                                                          |               | 14 (70%)  | 0 (NA%)  | 14 (70%) | 0 (NA%)   |        |
| NA                                                          |               | 228       | 36       | 0        | 192       |        |
| <b>How often do you brush your teeth?</b>                   | 248<br>(100%) |           |          |          |           | 0.176  |
| Every two days                                              |               | 2 (0.8%)  | 0 (0%)   | 0 (0%)   | 2 (1.0%)  |        |
| Once a day                                                  |               | 38 (15%)  | 5 (14%)  | 3 (15%)  | 30 (16%)  |        |
| Twice a day                                                 |               | 178 (72%) | 31 (86%) | 14 (70%) | 133 (69%) |        |
| Multiple times a day                                        |               | 30 (12%)  | 0 (0%)   | 3 (15%)  | 27 (14%)  |        |
| <b>What tools do you use?</b>                               | 248<br>(100%) |           |          |          |           |        |
| Electric toothbrush                                         |               | 38 (15%)  | 9 (25%)  | 3 (15%)  | 26 (14%)  |        |
| Toothbrush + other (e.g., wooden toothpick)                 |               | 19 (7.7%) | 1 (2.8%) | 1 (5.0%) | 17 (8.9%) |        |
| Toothbrush + dental floss / interdental cleaner             |               | 16 (6.5%) | 2 (5.6%) | 1 (5.0%) | 13 (6.8%) |        |
| Toothbrush + dental floss / interdental cleaner + mouthwash |               | 17 (6.9%) | 0 (0%)   | 0 (0%)   | 17 (8.9%) |        |
| Toothbrush + mouthwash                                      |               | 53 (21%)  | 10 (28%) | 3 (15%)  | 40 (21%)  |        |
| Toothbrush + mouthwash + other                              |               | 22 (8.9%) | 3 (8.3%) | 4 (20%)  | 15 (7.8%) |        |

|                                                                                       |               |              |             |             |              |       |
|---------------------------------------------------------------------------------------|---------------|--------------|-------------|-------------|--------------|-------|
| Manual + electric toothbrush                                                          |               | 13<br>(5.2%) | 1 (2.8%)    | 3 (15%)     | 9 (4.7%)     |       |
| Manual toothbrush                                                                     |               | 70<br>(28%)  | 10<br>(28%) | 5 (25%)     | 55<br>(29%)  |       |
| <b>What toothpaste do you use?</b>                                                    | 248<br>(100%) |              |             |             |              | 0.279 |
| Fluoride-free                                                                         |               | 9 (3.6%)     | 2 (5.6%)    | 2 (10%)     | 5 (2.6%)     |       |
| Fluoridated                                                                           |               | 92<br>(37%)  | 11<br>(31%) | 6 (30%)     | 75<br>(39%)  |       |
| Doesn't know, but uses toothpaste                                                     |               | 147<br>(59%) | 23<br>(64%) | 12<br>(60%) | 112<br>(58%) |       |
| <b>Do your gums tend to bleed when brushing your teeth?</b>                           | 244<br>(98%)  |              |             |             |              | 0.040 |
| Yes                                                                                   |               | 91<br>(37%)  | 9 (26%)     | 12<br>(60%) | 70<br>(37%)  |       |
| No                                                                                    |               | 153<br>(63%) | 26<br>(74%) | 8 (40%)     | 119<br>(63%) |       |
| NA                                                                                    |               | 4            | 1           | 0           | 3            |       |
| <b>Fluorosis</b>                                                                      | 248<br>(100%) |              |             |             |              | 0.305 |
| healthy                                                                               |               | 92<br>(37%)  | 9 (25%)     | 9 (45%)     | 74<br>(39%)  |       |
| mild                                                                                  |               | 1 (0.4%)     | 0 (0%)      | 1 (5.0%)    | 0 (0%)       |       |
| questionable                                                                          |               | 2 (0.8%)     | 0 (0%)      | 0 (0%)      | 2 (1.0%)     |       |
| moderate                                                                              |               | 1 (0.4%)     | 0 (0%)      | 0 (0%)      | 1 (0.5%)     |       |
| missing                                                                               |               | 1 (0.4%)     | 0 (0%)      | 0 (0%)      | 1 (0.5%)     |       |
| very mild                                                                             |               | 3 (1.2%)     | 1 (2.8%)    | 0 (0%)      | 2 (1.0%)     |       |
| Not examined                                                                          |               | 148<br>(60%) | 26<br>(72%) | 10<br>(50%) | 112<br>(58%) |       |
| <b>Have you noticed any of the following symptoms? - coated tongue, white coating</b> | 85<br>(34%)   |              |             |             |              | 0.562 |
| Yes                                                                                   |               | 29<br>(34%)  | 2 (18%)     | 4 (36%)     | 23<br>(37%)  |       |
| No                                                                                    |               | 56<br>(66%)  | 9 (82%)     | 7 (64%)     | 40<br>(63%)  |       |

|                                                                                    |             |             |             |         |             |        |
|------------------------------------------------------------------------------------|-------------|-------------|-------------|---------|-------------|--------|
| NA                                                                                 |             | 163         | 25          | 9       | 129         |        |
| <b>Have you noticed any of the following symptoms? - bad taste in the mouth</b>    | 85<br>(34%) |             |             |         |             | 0.432  |
| Yes                                                                                |             | 26<br>(31%) | 5 (45%)     | 2 (18%) | 19<br>(30%) |        |
| No                                                                                 |             | 59<br>(69%) | 6 (55%)     | 9 (82%) | 44<br>(70%) |        |
| NA                                                                                 |             | 163         | 25          | 9       | 129         |        |
| <b>Have you noticed any of the following symptoms? - sore on the gum</b>           | 85<br>(34%) |             |             |         |             | 0.403  |
| Yes                                                                                |             | 27<br>(32%) | 2 (18%)     | 5 (45%) | 20<br>(32%) |        |
| No                                                                                 |             | 58<br>(68%) | 9 (82%)     | 6 (55%) | 43<br>(68%) |        |
| NA                                                                                 |             | 163         | 25          | 9       | 129         |        |
| <b>Have you noticed any of the following symptoms? - sharp, burning sensation.</b> | 85<br>(34%) |             |             |         |             | <0.001 |
| Yes                                                                                |             | 8 (9.4%)    | 1 (9.1%)    | 5 (45%) | 2 (3.2%)    |        |
| No                                                                                 |             | 77<br>(91%) | 10<br>(91%) | 6 (55%) | 61<br>(97%) |        |
| NA                                                                                 |             | 163         | 25          | 9       | 129         |        |
| <b>Have you noticed any of the following symptoms? - dry mouth</b>                 | 85<br>(34%) |             |             |         |             | 0.499  |
| Yes                                                                                |             | 20<br>(24%) | 1 (9.1%)    | 2 (18%) | 17<br>(27%) |        |
| No                                                                                 |             | 65<br>(76%) | 10<br>(91%) | 9 (82%) | 46<br>(73%) |        |
| NA                                                                                 |             | 163         | 25          | 9       | 129         |        |

|                                            |               |              |             |             |              |        |
|--------------------------------------------|---------------|--------------|-------------|-------------|--------------|--------|
| <b>How often do you visit the dentist?</b> | 248<br>(100%) |              |             |             |              |        |
| Only when it hurts                         |               | 41<br>(17%)  | 5 (14%)     | 2 (10%)     | 34<br>(18%)  |        |
| Yearly                                     |               | 72<br>(29%)  | 16<br>(44%) | 3 (15%)     | 53<br>(28%)  |        |
| Every six months                           |               | 76<br>(31%)  | 12<br>(33%) | 4 (20%)     | 60<br>(31%)  |        |
| More frequently than every six months      |               | 48<br>(19%)  | 3 (8.3%)    | 9 (45%)     | 36<br>(19%)  |        |
| Less frequently than yearly                |               | 11<br>(4.4%) | 0 (0%)      | 2 (10%)     | 9 (4.7%)     |        |
| <b>Are you aware of gum problems?</b>      | 247<br>(100%) |              |             |             |              | 0.002  |
| Yes                                        |               | 5 (2.0%)     | 1 (2.8%)    | 3 (15%)     | 1 (0.5%)     |        |
| No                                         |               | 242<br>(98%) | 35<br>(97%) | 17<br>(85%) | 190<br>(99%) |        |
| NA                                         |               | 1            | 0           | 0           | 1            |        |
| <b>Do you use a mouthguard?</b>            | 247<br>(100%) |              |             |             |              | <0.001 |
| Only during training                       |               | 1 (0.4%)     | 1 (2.9%)    | 0 (0%)      | 0 (0%)       |        |
| only during matches                        |               | 15<br>(6.1%) | 5 (14%)     | 3 (15%)     | 7 (3.6%)     |        |
| Yes, regularly                             |               | 14<br>(5.7%) | 5 (14%)     | 3 (15%)     | 6 (3.1%)     |        |
| Do not use                                 |               | 217<br>(88%) | 24<br>(69%) | 14<br>(70%) | 179<br>(93%) |        |
| NA                                         |               | 1            | 1           | 0           | 0            |        |
| <b>mouthguard/ dental splint usage</b>     | 247<br>(100%) |              |             |             |              | <0.001 |

|                                                                                                                                                                                                                     |               |              |             |             |              |        |
|---------------------------------------------------------------------------------------------------------------------------------------------------------------------------------------------------------------------|---------------|--------------|-------------|-------------|--------------|--------|
| Use                                                                                                                                                                                                                 |               | 30<br>(12%)  | 11<br>(31%) | 6 (30%)     | 13<br>(6.8%) |        |
| do not use                                                                                                                                                                                                          |               | 217<br>(88%) | 24<br>(69%) | 14<br>(70%) | 179<br>(93%) |        |
| NA                                                                                                                                                                                                                  |               | 1            | 1           | 0           | 0            |        |
| Note: The low number of patients (30, 12%) using mouthguard was due to the obligation for children to wear a cage to protect their heads from injuries. Therefore, almost no traumatic tooth loss could be noticed. |               |              |             |             |              |        |
| <b>Mouthguard type</b>                                                                                                                                                                                              | 248<br>(100%) |              |             |             |              | <0.001 |
| Individually crafted by a professional                                                                                                                                                                              |               | 11<br>(4.4%) | 1 (2.8%)    | 3 (15%)     | 7 (3.6%)     |        |
| Do not use                                                                                                                                                                                                          |               | 218<br>(88%) | 25<br>(69%) | 14<br>(70%) | 179<br>(93%) |        |
| Not professionally crafted                                                                                                                                                                                          |               | 18<br>(7.3%) | 9 (25%)     | 3 (15%)     | 6 (3.1%)     |        |
| do not know                                                                                                                                                                                                         |               | 1 (0.4%)     | 1 (2.8%)    | 0 (0%)      | 0 (0%)       |        |
| <b>Dental condition</b>                                                                                                                                                                                             | 248<br>(100%) |              |             |             |              | 0.183  |
| Tooth loss                                                                                                                                                                                                          |               | 11<br>(4.4%) | 1 (2.8%)    | 1 (5.0%)    | 9 (4.7%)     |        |
| Decay                                                                                                                                                                                                               |               | 118<br>(48%) | 18<br>(50%) | 15<br>(75%) | 85<br>(44%)  |        |
| Completely healthy teeth                                                                                                                                                                                            |               | 80<br>(32%)  | 13<br>(36%) | 2 (10%)     | 65<br>(34%)  |        |
| Filling, no decay                                                                                                                                                                                                   |               | 39<br>(16%)  | 4 (11%)     | 2 (10%)     | 33<br>(17%)  |        |
| <b>Gum bleeding (groups)</b>                                                                                                                                                                                        | 248<br>(100%) |              |             |             |              |        |
| < 10%                                                                                                                                                                                                               |               | 48<br>(19%)  | 2 (5.6%)    | 6 (30%)     | 40<br>(21%)  |        |
| > 50%                                                                                                                                                                                                               |               | 13<br>(5.2%) | 1 (2.8%)    | 4 (20%)     | 8 (4.2%)     |        |
| 10 - 20%                                                                                                                                                                                                            |               | 21<br>(8.5%) | 6 (17%)     | 1 (5.0%)    | 14<br>(7.3%) |        |
| 20 - 50%                                                                                                                                                                                                            |               | 25<br>(10%)  | 6 (17%)     | 2 (10%)     | 17<br>(8.9%) |        |
| NA                                                                                                                                                                                                                  |               | 141<br>(57%) | 21<br>(58%) | 7 (35%)     | 113<br>(59%) |        |

|                      |              |              |              |             |              |       |
|----------------------|--------------|--------------|--------------|-------------|--------------|-------|
| <b>Tooth erosion</b> | 241<br>(97%) |              |              |             |              | 0.275 |
| No sign              |              | 238<br>(99%) | 33<br>(100%) | 19<br>(95%) | 186<br>(99%) |       |
| Enamel lesion        |              | 3 (1.2%)     | 0 (0%)       | 1 (5.0%)    | 2 (1.1%)     |       |
| NA                   |              | 7            | 3            | 0           | 4            |       |

***Supplementary Table S5 – The combined effect of snus usage and oral hygiene habits on gum bleeding***

| Characteristic                                  | N            | Overall           | Usage of snus and tooth brushing                          |                                                             |                                                        |                                                          |                                                   |                                                     | p-value2 |
|-------------------------------------------------|--------------|-------------------|-----------------------------------------------------------|-------------------------------------------------------------|--------------------------------------------------------|----------------------------------------------------------|---------------------------------------------------|-----------------------------------------------------|----------|
|                                                 |              | N = 248<br>(100%) | Occasional use of snus, tooth brushing once a day or less | Occasional use of snus, tooth brushing at least twice a day | Regular use of snus, tooth brushing once a day or less | Regular use of snus, tooth brushing at least twice a day | Never use snus, tooth brushing once a day or less | Never use snus, tooth brushing at least twice a day |          |
|                                                 |              |                   | N = 5 (2.0%) <i>I</i>                                     | N = 31 (13%) <i>I</i>                                       | N = 3 (1.2%) <i>I</i>                                  | N = 17 (6.9%) <i>I</i>                                   | N = 32 (13%) <i>I</i>                             | N = 160 (65%) <i>I</i>                              |          |
| Does your gums bleed when you brush your teeth? | 244<br>(98%) |                   |                                                           |                                                             |                                                        |                                                          |                                                   |                                                     | 0.003    |
| yes                                             |              | 91 (37%)          | 3 (60%)                                                   | 6 (20%)                                                     | 3 (100%)                                               | 9 (53%)                                                  | 17 (55%)                                          | 53 (34%)                                            |          |
| no                                              |              | 153 (63%)         | 2 (40%)                                                   | 24 (80%)                                                    | 0 (0%)                                                 | 8 (47%)                                                  | 14 (45%)                                          | 105 (66%)                                           |          |

***Supplementary Table S6 - Dental caries***

|                          |               | Overall   | Occasional user | Regular user | Never used snus | p-value |
|--------------------------|---------------|-----------|-----------------|--------------|-----------------|---------|
| <b>Dental condition</b>  | 248<br>(100%) |           |                 |              |                 | 0.183   |
| Tooth loss               |               | 11 (4.4%) | 1 (2.8%)        | 1 (5.0%)     | 9 (4.7%)        |         |
| Decay                    |               | 118 (48%) | 18 (50%)        | 15 (75%)     | 85 (44%)        |         |
| Completely healthy teeth |               | 80 (32%)  | 13 (36%)        | 2 (10%)      | 65 (34%)        |         |
| Filling, no decay        |               | 39 (16%)  | 4 (11%)         | 2 (10%)      | 33 (17%)        |         |

***Supplementary Table S7 - The combined effect of snus usage and oral hygiene habits on dental caries***

|                      |            | Overall   | Occasional use of snus, tooth brushing once a day or less | Occasional use of snus, tooth brushing at least twice a day | Regular use of snus, tooth brushing once a day or less | Regular use of snus, tooth brushing at least twice a day | Never use snus, tooth brushing once a day or less | Never use snus, tooth brushing at least twice a day | p-value |
|----------------------|------------|-----------|-----------------------------------------------------------|-------------------------------------------------------------|--------------------------------------------------------|----------------------------------------------------------|---------------------------------------------------|-----------------------------------------------------|---------|
| <b>Dental status</b> | 248 (100%) |           |                                                           |                                                             |                                                        |                                                          |                                                   |                                                     | 0.529   |
| Tooth loss           |            | 11 (4.4%) | 0 (0%)                                                    | 1 (3.2%)                                                    | 0 (0%)                                                 | 1 (5.9%)                                                 | 2 (6.3%)                                          | 7 (4.4%)                                            |         |
| Decay                |            | 118 (48%) | 4 (80%)                                                   | 14 (45%)                                                    | 3 (100%)                                               | 12 (71%)                                                 | 17 (53%)                                          | 68 (43%)                                            |         |
| Completely healthy   |            | 80 (32%)  | 1 (20%)                                                   | 12 (39%)                                                    | 0 (0%)                                                 | 2 (12%)                                                  | 7 (22%)                                           | 58 (36%)                                            |         |
| Filled, not decayed  |            | 39 (16%)  | 0 (0%)                                                    | 4 (13%)                                                     | 0 (0%)                                                 | 2 (12%)                                                  | 6 (19%)                                           | 27 (17%)                                            |         |

For all tables above:

|                                                                                        |
|----------------------------------------------------------------------------------------|
| <i>I</i> n (%)                                                                         |
| 2 Fisher's exact test                                                                  |
| * Fisher's Exact Test for Count Data with simulated p-value (based on 2000 replicates) |
